# Supplementary material for: Microalgae biorefinery concept based on hydrothermal microwave pyrolysis
Source: Royal Society of Chemistry journal article supplement (doi:10.1039/c2gc36202c), 2012-01-01
Supplement: c2gc36202c.pdf [file c2gc36202c.pdf]

## Microalgae biorefinery concept based on hydrothermal microwave pyrolysis

V. Budarin<sup>a</sup>, A.B.Ross<sup>b</sup>, P. Biller<sup>b</sup>, R. Riley<sup>b</sup>, J.H. Clark<sup>a</sup>, J.M. Jones<sup>b</sup>, D.J.Gilmour<sup>c</sup>, W. Zimmerman<sup>d</sup>

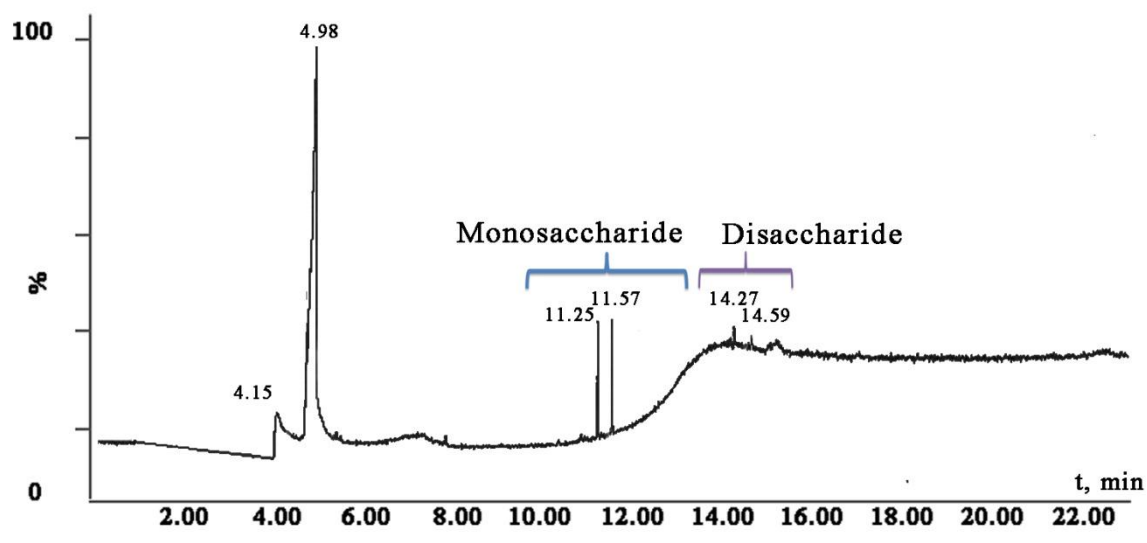

Fig.1S GC-MS analysis of products of microwave activated hydrolysis of cellulose silylated by TMSIM.

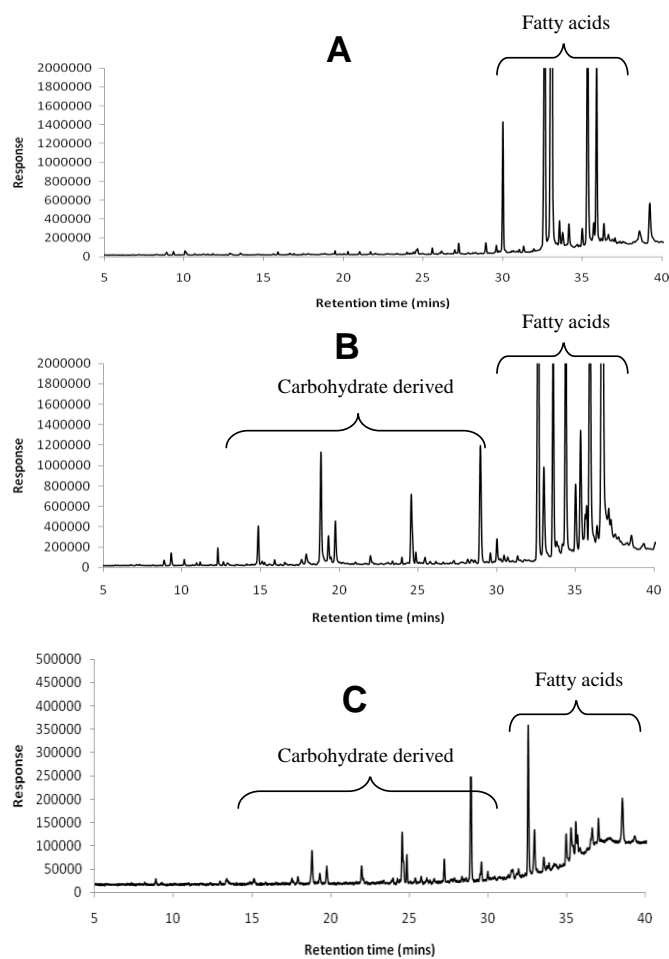

Fig. 2S GC-MS analysis using a Stabilwax column of (a) DCM soluble fraction from Nannochloropsis, (b) Chlorella (c) Porphyridium

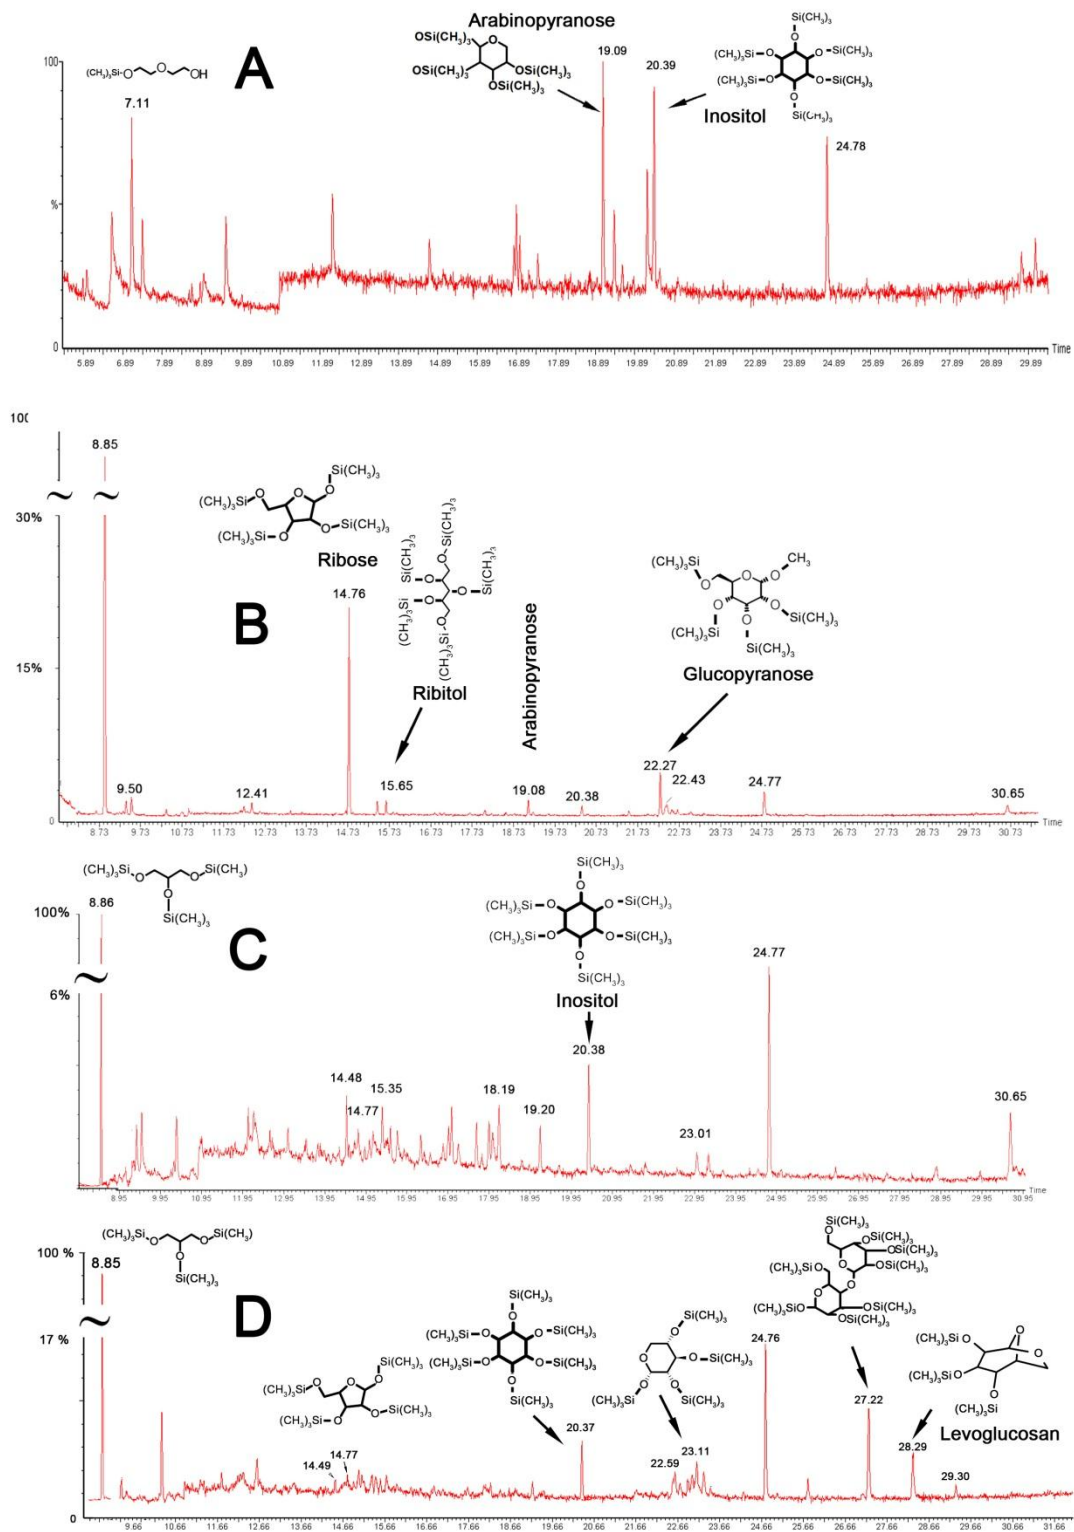

**Fig.3S.** GC-MS traces for EtOH fraction of water phase from A) Nannochloropsis; B) Porphyridium; C) Chlorella; D) Spirulina.

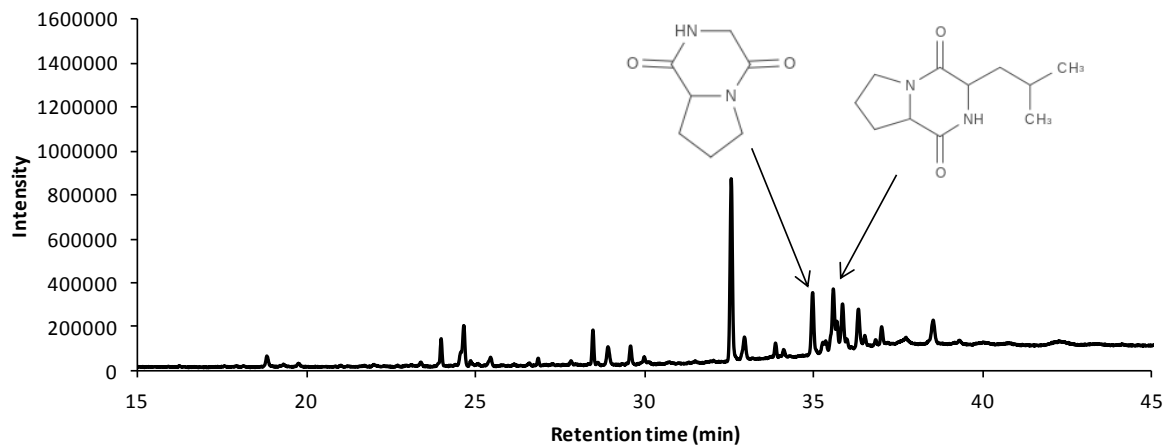

**Fig.4S.** GC-MS chromatogram using a Stabilwax column of the DCM phase of protein at 185°C.
